# Supplementary material
Source: PubMed Central journal article supplement (PMC3196721)
Supplement: NIHMS326328-supplement-01.pdf [file NIHMS326328-supplement-01.pdf]

**Supplemental Table 1: Oligonucleotides used in Lindner *et al.* 2011.**

| Oligonucleotide Name               | Oligonucleotide Sequence                              |
|------------------------------------|-------------------------------------------------------|
| pET28b-PfPrex AA115-Fwd            | GATCAAACATATGAGTGCTACTAGCACTTTTGTTCAAAAGTATT          |
| pET28b-PfPrex AA336-Fwd            | CATATGGATAATTATGAAGTGGTACGAATAAAAATTAGAAGTTTAAAGG     |
| pET28b-PfPrex AA465-Rev            | CTCGAGTTAATCTGGATTTAAATAGTGAACATTGGCATCCGTAATTAC      |
| pDC2_hsp86-PfPrex AA1-Fwd          | CCACCTAGGATGCTTTTGTATAAGTTTTATTTTTATACTTTTTGCTCG      |
| pDC2_hsp86-PfPrex AA465-Rev        | GGAAGATCTATCTGGATTTAAATAGTGAACATTGGCATCCGTAATTACG     |
| PyPrex-KO-5'UTR-Fwd                | ATATTCGTGCCTGCAGGGTTGCCCTCATTTATATGCCTATATATAACAATGCC |
| PyPrex-KO-5'UTR-Rev                | GTGCGGCCGCTTCTCATTGGGGCAATTATTTTTACTTG                |
| PyPrex-KO-3'UTR-Fwd                | CCGATATCCCATACCCATTAAGGTATGTCAAACATG                  |
| PyPrex-KO-3'UTR-Rev                | GAGGGCAACCCTGCAGGCACGAATATATACGTATACATATACATGCG       |
| PyPrex-Genotype-5'-External        | CAAGTTGTTATCGTCTCAAAAAAATCTATGC                       |
| PyPrex-Genotype-3'-External        | CGAATCATAGACTGACAATTGAAACGTTTAAAAAAGTCC               |
| PyPrex-Genotype-5'-Internal        | CCTATTTTTTCGTCTTCGAATTCCTAAGGCTAAATTTAGG              |
| PyPrex-Genotype-3'-Internal        | GTGAGGTTTCCGTTAAAATAGCGGAAAATTGGGGTAG                 |
| PyPrex-Genotype-5'-Vector-Specific | TGTAAAACGACGGCCAGTGAATTGTAATACGACTCACTATAGGG          |
| PyPrex-Genotype-3'-Vector-Specific | GTTGTCTCTTCAATGATTCATAAATAGTTGGACTTG                  |
