# Supplementary material
Source: PubMed Central journal article supplement (PMC3196721)
Supplement: NIHMS326328-supplement-02.pdf [file NIHMS326328-supplement-02.pdf]

**Supplemental Figure 1: Lindner *et al.* 2011**

|             |                                                    |
|-------------|----------------------------------------------------|
| PfPrex      | SATSTFVSKYYKININDVYNYLHRKK--YEFIETDIKITLKYCPFCPPHK |
| Dm          | MA-----SIVKAHLPCNTCGSH-                            |
| Vi06        | MDNM-----LSDSIFLYHEPCPCGSS-                        |
| T3          | MER-----EDDSIFLFHAPCENCSS-                         |
| T7          | MDNS-----HSDSVFLYHIPCDNCGSS-                       |
| K1F         | MSYDD-----QDDESFLYHTQCPDCGSS-                      |
| phiIBB-PF7A | MSE-----HEEESVLMHKGPCFCGSS-                        |
| Pp          | MPMKN-----RK-----HETVSEFVRHLPCENCSS-               |
| 285P        | MDME-----EQQESIFLYHLPCENCGPS-                      |
| TJI-51      | ME-----                                            |
| Bo          | MAD-----A-----                                     |
| phi15       | MSHE-----DREEAVLLHKGPCDHCSS-                       |
| Vv          | MAQ-----ESNFLQKEPCPKCGSK-                          |
| VP4         | MSYEY-----E-----DREESIFLYHLPCENCSS-                |
| Bw          | MNNRK-----NDKSSERHPYEDSTFSHHEPCPCQRNG              |
| CPm         | MQIT-----NDEQTEFIRHESCPKCGSS-                      |

|             |                                                  |
|-------------|--------------------------------------------------|
| PfPrex      | YKYDNMYKHEIFKNTG-----NSYCHR--CGYKGSFYDFKLMGDLITS |
| Dm          | -----DALC-TYSDG-----STYCFS--CNTCIQK-----G-----   |
| Vi06        | -----DAGA-RYSDN-----HFHCFV--CGHYIK-----G-----    |
| T3          | -----DGNS-VYSDG-----HEWCFV--CEHRVP-----A-----    |
| T7          | -----DGNS-LFSDG-----HTFCYV--CEKWTA-----G-----    |
| K1F         | -----DANG-VYSDG-----HQFCFA--CDPSVA-----W-----    |
| phiIBB-PF7A | -----DARA-VYSDG-----HSFCYA--CPEGDA-----W-----    |
| Pp          | -----DANS-IYTDN-----HQYCFV--CEHYVH-----G-----    |
| 285P        | -----NGNG-MYSDG-----HQYCFV--CQNHVR-----G-----    |
| TJI-51      | -----                                            |
| Bo          | -----                                            |
| phi15       | -----DARA-VYSDG-----HSFCFA--CPEETA-----W-----    |
| Vv          | -----DNLA-RYDDG-----HAHCFTNGCDYFEP-----A-----    |
| VP4         | -----DANS-MFSDG-----HTFCYV--CEKYVP-----P-----    |
| Bw          | GDWNG-DNLA-RYSDG-----HGYCHV--CGYYET-----A-----   |
| CPm         | -----DALA-VYGDSATQEVHGWCFV--CQTFQK-----G-----    |

|             |                                                      |
|-------------|------------------------------------------------------|
| PfPrex      | NFESTVVHNNNFYEEEEEEKI----TLNDVKVYNNMNLAYSKE-AENARNYL |
| Dm          | -----NNDTVTI-----PQ-DSLVISS                          |
| Vi06        | -----DGYGPERSYK-----RTGG-TPMTKG-VWSFGE-ANGRFSA       |
| T3          | -----NEEREAKLSTRR----RTGGSKPMSYD-VWNFGD-SNGRYS       |
| T7          | -----NEDTKERASKRK----PSGG-KPMTYN-VWNFGE-SNGRYS       |
| K1F         | -----KKGDMELTEGYT----PSGG-RKQVSN-LLTFGE-NAGRYVP      |
| phiIBB-PF7A | -----KPGDGEYVPA----ARST-KPAAEG-TISFNE-KQGRYTA        |
| Pp          | -----DGETPTTGGRT-----K-----RMEGL-ISGEFKP             |
| 285P        | -----TEETRETVAKTRRSSYNTGG-DKM-SN-LLNFGD-SDGRYTN      |
| TJI-51      | -----GL-ISGEFKP                                      |
| Bo          | -----D-TASTGL-LRGEYRP                                |
| phi15       | -----QAGEDYQGSQK-----EGVG-KTRSEG-TISFSE-KQGRYAA      |
| Vv          | -----TDNQ--RPPKQ-----KQQA-KPKK-E-RKEFTP-IEGEYRP      |
| VP4         | -----SGVEQTDYSY-SN----TTGG-KKKMSN-VYSMQE-LNGGYQA     |
| Bw          | -----QGGSGRMDRQK-----D-----PVPFDPVPVDAFMA            |
| CPm         | -----DNVDGSYTNTPKR-----N-SSSANL-LDGEYNE              |

|             |                                                    |
|-------------|----------------------------------------------------|
| PfPrex      | MNVRKLSIDTLKKFLIGFSVME-FQSFESSGKFEKHECIIFPFIKKVDEI |
| Dm          | LKKRGITKATCHKYGYISKNA-KTPMQVACY-----               |
| Vi06        | LTARGISKETCQKAGYWLAKVD-GVVYQVADY-----              |
| T3          | LTARGISKETCQKAGYWLAKVD-NRMYQVADY-----              |
| T7          | LTARGISKETCQKAGYWIAKVD-GVMYQVADY-----              |
| K1F         | LPARSLSMEICKKYSYWVGNMG-GKMVQVADY-----              |
| phiIBB-PF7A | LKARGLMEDVCKQYGYWVGTFSS-GESKQVANY-----             |
| Pp          | LMKRKLTLETCTCRKFGYFVSEVR-GRLVQVAPY-----            |
| 285P        | LKARGLMEAICRKYGYWVAKVN-GEMLQVANY-----              |
| TJI-51      | LMKRKLTLETCTCRKFGYFVSEVR-GRLVQVAPY-----            |
| Bo          | LGKRGIAEETCRKYGYLVGEDRDGVPVQIATY-----              |
| phi15       | LPKRGLMEAVCRQYGYWLGTFN-GETKQVANY-----              |
| Vv          | LTKRGIREDTCKKYGYKVGKLSGGGEWVQYIDV-----             |
| VP4         | LNARGITEDTCRKYGYWVGKDQ-KVTYQIANY-----              |
| Bw          | LKARGITQETCEHFYGYGIGKAG-GKYCHIAPL-----             |
| CPm         | IKSRGLTEETCRKFNYTTAIHN-GEPPVQVATY-----             |
|             | : * : .: . .                                       |

|             |                                                               |
|-------------|---------------------------------------------------------------|
| PfPrex      | NMIETNGINSNMKNMNNNNNNNNNNNNNNNNNNNNNNNNNNNNNNINDN-YEYVRIKIRSL |
| Dm          | -----YDD-NGECIGKKIRY-                                         |
| Vi06        | -----RDQ-NGTIVSQKIRD-                                         |
| T3          | -----RDQ-NGSIVSQKVRD-                                         |
| T7          | -----RDQ-NGNIVSQKVRD-                                         |
| K1F         | -----YDR-SGTKVQKVRD-                                          |
| phiIBB-PF7A | -----YDM-DRNLVAQKVRD-                                         |
| Pp          | -----FDN-SGVMVAQKLRD-                                         |
| 285P        | -----YDV-EGNLVGQKVRD-                                         |
| TJI-51      | -----FDN-SGVMVAQKLRD-                                         |
| Bo          | -----CDS-AGSPVAQKLRN-                                         |
| phi15       | -----YGD-DGSIVAQKVRD-                                         |
| Vv          | -----RDPLTRQLVAQKIRT-                                         |
| VP4         | -----YDE-TGTLVFQKLRD-                                         |
| Bw          | -----YDH-EGILVAQHLLRF-                                        |
| CPm         | -----LDE-NGRPVAQKVRT-                                         |
|             | . : :*                                                        |

|             |                                                     |
|-------------|-----------------------------------------------------|
| PfPrex      | KDKGYMRLYPKNVRNEMKLFFFGDHLIK-NS--EEIVLTEGEIDAMTISQ  |
| Dm          | PDKHFAVE-----GTIS-HRFFGQHLWA-NGHMKKLVITEGEIDCLTVSQ  |
| Vi06        | KDKNFKTT-----GSHKSDALFGKHLWS-GG--KKIVVTEGEVDMLTVME  |
| T3          | KDKNFKTT-----GSHKSDALFLKHLWS-GG--KKIVVTEGEIDALTVME  |
| T7          | KDKNFKTT-----GSHKSDALFGKHLWN-GG--KKIVVTEGEIDMLTVME  |
| K1F         | AEKNFTAI-----GSVKSMDLFGSQLWN-GG--KKIVITEGEIDALSVAQ  |
| phiIBB-PF7A | RHKEFFIA-----GKMPKDGLFGKHLWT-GG--KKIVVTEGEIDCLTVAQ  |
| Pp          | QDKGFAIL-----GDGAKLTLFGQNLWASGG--KKIVVTEGELDAMSVSQ  |
| 285P        | KNKEFSAK-----GKLKADLLFGKQLWN-GG--KKIVVTEGEIDCLTVAQ  |
| TJI-51      | QDKGFAIL-----GDGAKLTLFGQNLWASGG--KKIVVTEGELDAMSVSQ  |
| Bo          | ADKEFVVV-----GKLKHAGLFGQHLWRTTG--KKVIVTEGEIDCLSVAQ  |
| phi15       | RNKEFFIA-----GSMPKDALFGKHLWS-GG--KKVVVTEGEIDCLTVAQ  |
| Vv          | ENKQFLVK-----GTLTG-ELIGAHLFS-GG--KKLIITEGEIDMLTVSQ  |
| VP4         | KDKNFKTR-----GKSSDSLFGKLNWN-GG--RKLIITEGEIDCLTVAQ   |
| Bw          | EGKEFRWR-----GSASEAVLFGQTLWRRGG--RKVIVTEGEIDCLISISQ |
| CPm         | KSKKFTML-----GDAKAATLYGSHLYK-TG--KKLVICEGEIDAMTVSQ  |
|             | * : : * . . : : : * * * * * : : :                   |

PfPrex --ETKYP AISLPNGSKSLPI---YLLPYLERFKKIHLWLDLDFDKAGKSSVF  
Dm LQENKYPVSI PNGAASAKKVFKENMEWLNTFEEVIVMFDMD EAGRKAVE  
Vi06 LQDCKYPVVS L GHGASA AKKTCAANYEYFDQFEQI ILMFDMDEAGRKAVE  
T3 LQDCKYPVVS L GHGASA AKKTCAANYEYFDQFEQI ILMFDMDDAGRKAVE  
T7 LQDCKYPVVS L GHGASA AKKTCAANYEYFDQFEQI ILMFDMDEAGRKAVE  
K1F VQDGKYPVVS LPLGAKS AKKAMAANLEYLDQFEEI ILMFDMDEPGRQAIE  
phiIBB-PF7A IQGGKYPVVS I PRGAEDAKK VCAANFEYFNQFEQI ILMFDMDAPGRAASL  
Pp VQNNKWPVVS L PNGAPAARKAIQRNIEYLESFEEVILMFDMD EPGREAAQ  
285P LQEGKYPVVS LPMGAQA AKKTCAANFEYFDQFDEI ILMFDMDEPGRKAIE  
TJI-51 VQNNKWPVVS L PNGAPAARKAIQRNIEYLESFEEVILMFDMD EPGREAAQ  
Bo ALSLKWPVVS VPNGAQA AKSLAAQIEWLRGYEEIVLWFDNDDPGREAVA  
phi15 LQGGKYPVVS I PRGAKDAKKTIAANKDWFSGFQEI ILMFDMDEDPGRKAAL  
Vv VQSNKYPVVS L PNGISSAKKAIMNNLDYLSNFEEI ILCFDMDEVGREGAV  
VP4 IQGCKYPVVS I PLGAKAAK KCIANLDYFEQFEEI ILMFDQDDAGRAAAQ  
Bw LQGNKWPVVS L PNGSSGAKYIRASLEWLESFDEVVFAFDMDEPGQKAAK  
CPm VQGHKWATVSLTQGCSSAVKTMKNNWEFITKFEEVILMFDMD SVGQKAAQ  
\*:. :\*: \* :: :.:. . :\* \* \*:. .

PfPrex N FVNKIGLGR TNVI-----TDANVHYLN-----PD  
Dm DVQGLLKPRKLKIANLP--LKDPNECLIAGRGQ----E  
Vi06 EAAQVLPAGKVRVAVLP--CKDANECHLN GH-----D  
T3 EAAQVLPAGKVRVAVLP--CKDANECHIMGE-----D  
T7 EAAQVLPAGKVRVAVLP--CKDANECHLN GH-----D  
K1F DAAPVLPAGRVKVAFIN-GYKDANAALQA-K-----D  
phiIBB-PF7A EAADVLPAGKVHIAVLP--LKDPNECLLAGNSKAVIDQ  
Pp ECAELFSPGKCKIATLS--MKDANE LLVAGREQ----E  
285P ECAPVLPSPGKVRVAVLP--LKDANECLLNQOAKAV-TD  
TJI-51 ECAELFSPGKCKIATLS--MKDANE LLVAGREQ----E  
Bo ACAA ILPPGRVKFITTPHELKDANDLLREHGPKAV-VD  
phi15 EAAEVLPA GRVFI AKLP--LKDANE CILNGHAKAV-MD  
Vv EAAELLIDHNVKIMSLP--LKDPNEMLLAGRT----EE  
VP4 ECAEIMPMGKTKIAVLP--LKDANECLLAGKTKEV-ID  
Bw ECALLLSPGKAKIARLP--MKDANECLVAGKGKEL-ID  
CPm EAAATLPVGKAKIAYLP--CKDANECLLQGKSAEI-IQ  
: . . .\*. \* :

**Abbreviations:** PfPrex: PfPrex (AA115-465); Dm: Dialister microaerophilus DNA primase/helicase; Vi06: Salmonella phage Vi06 predicted DNA primase-helicase; T3: Enterobacteria phage T3 4A; T7: Enterobacteria phage T7 unnamed protein product; K1F: Enterobacteria phage K1F gp4A protein; phiIBB-PF7A: Pseudomonas phage phiIBB-PF7A putative primase/helicase; Pp: Pseudomonas putida KT2440 DNA primase/helicase; 285P: Enterobacteria phage 285P gp4a; TJI-51: Pseudomonas sp. TJI-51 DNA primase/helicase; Bo: Burkholderia oklahomensis EO147 DNA primase; phi15: Pseudomonas phage phi15 putative DNA primase/helicase; Vv: Vibrio vulnificus MO6-24/O DNA primase/helicase; VP4: Vibriophage VP4 Primase/Helicase; Bw: Bilophila wadsworthia 3\_1\_6 toprim domain-containing protein; CPm: Candidatus Puniceispirillum marinum IMCC1322 DNA primase

**Consensus Key:**

- \* / asterisk: Identity
- : / double-dot: Conserved Physiochemical Group
- . / single-dot: Semi-Conserved Physiochemical Group
