# Supplementary material
Source: PubMed Central journal article supplement (PMC3196721)

Supplemental Figure 2: Lindner *et al.* 2011

A.

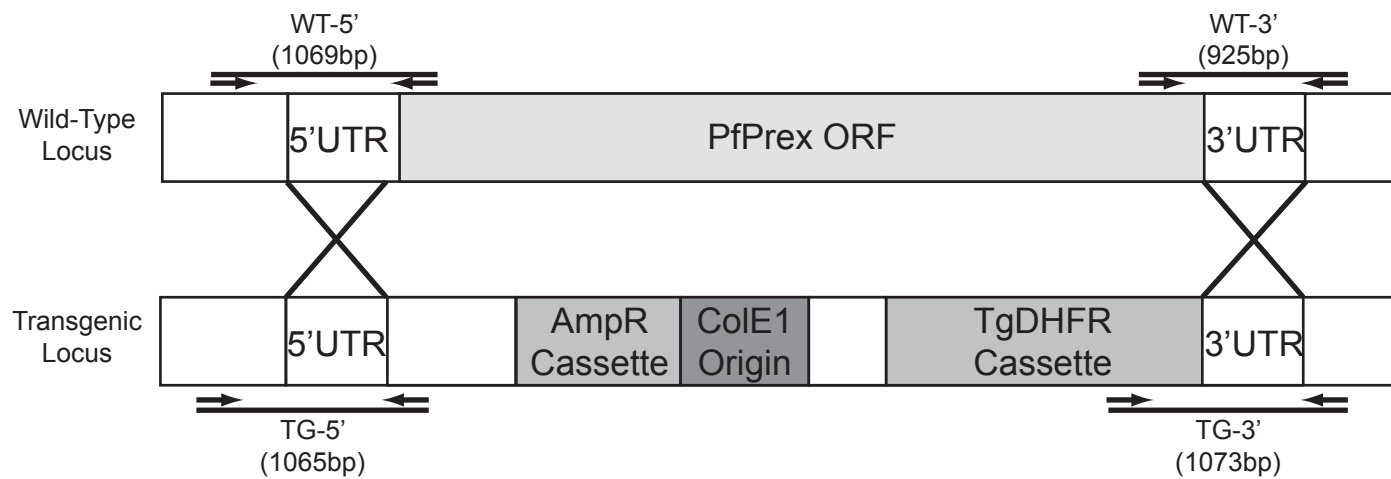

B.

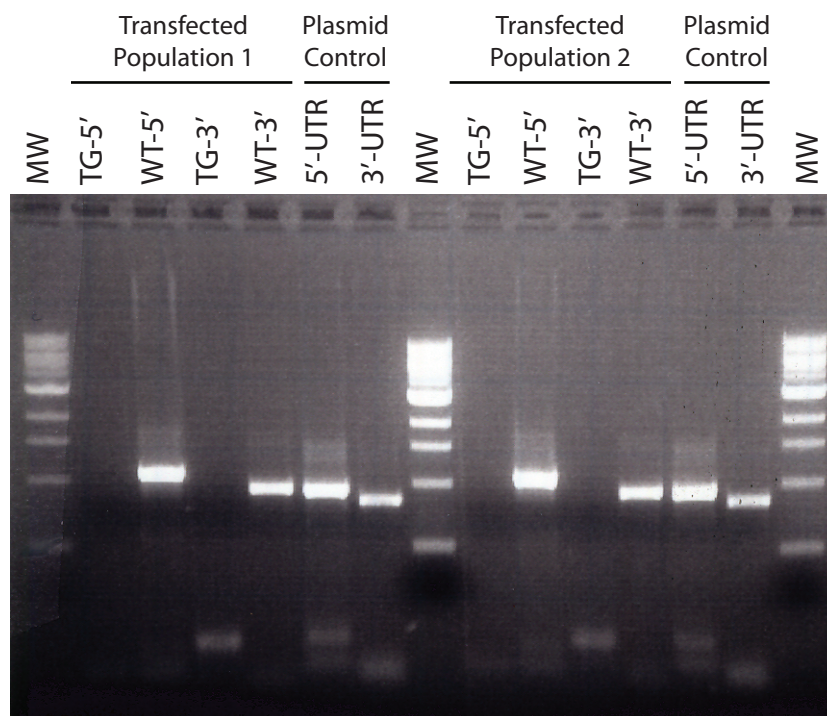

Supplement: NIHMS326328-supplement-03.pdf [file NIHMS326328-supplement-03.pdf]

Supplemental Figure 3: Lindner *et al.* 2011

MW Marker  
Pf 3D7  
PfPrex Primase

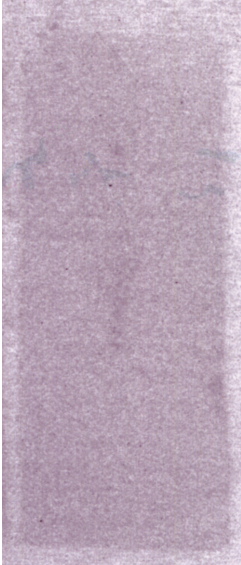

Supplement: NIHMS326328-supplement-04.pdf [file NIHMS326328-supplement-04.pdf]
